# Supplementary material for: The carbon footprint of a Malaysian tropical reservoir: measured versus modeled estimates highlight the underestimated key role of downstream processes
Source: Copernicus journal article supplement (doi:10.5194/bg-2019-385), 2019-10-14
Supplement: Supplementary file 1 [file bg-2019-385-supplement.pdf]

# Supporting Information

## The carbon footprint of a Malaysian tropical reservoir: measured versus modeled estimates highlight the underestimated key role of downstream processes

Cynthia Soued<sup>1</sup>, Yves T. Prairie<sup>1</sup>

<sup>1</sup>Groupe de Recherche Interuniversitaire en Limnologie et en Environnement Aquatique (GRIL), Département des Sciences Biologiques, Université du Québec à Montréal, Montréal, H2X 3X8, Canada.

*Correspondence to:* Cynthia Soued (cynthia.soued@gmail.com)

### **Supplementary information content:**

- **Table S1.** Summary of the mean, standard deviation (SD), range (min and max), and number of observation (n) of physical and chemical variables measured at the surface of the reservoir and its inflows.
- **Figure S1.** Example of a profile of temperature, CO<sub>2</sub> and CH<sub>4</sub> concentrations in the main basin of the reservoir (site right upstream of the dam).
- **Figure S2.** Maps of the spatially interpolated surface CO<sub>2</sub> diffusive flux in Batang Ai reservoir for each sampling campaign. Unit is in mmol.m<sup>-2</sup>.d<sup>-1</sup>. Graph axes are the spatial coordinates (latitude and longitude).
- **Figure S3.** Maps of the spatially interpolated surface CH<sub>4</sub> diffusive flux in Batang Ai reservoir for each sampling campaign. Unit is in mmol.m<sup>-2</sup>.d<sup>-1</sup>. Graph axes are the spatial coordinates (latitude and longitude).

- **Figure S4.** Simulated downstream emissions (including degassing) of CO<sub>2</sub> (gray squares) and CH<sub>4</sub> (dark circles) under different water withdrawal depth raise. Simulated emissions do not take into account CH<sub>4</sub> oxidation in the outflow river.
- **Table S2.** Equations used to derive modeled CO<sub>2</sub> and CH<sub>4</sub> emissions based on the G-res and Barros et al. models. Input variables are described in Table S3.
- **Table S3.** Input variables values, units, and source used in the modeling of Batang Ai CO<sub>2</sub> and CH<sub>4</sub> emissions.
- Modeling downstream river oxidation

**Table S1:** Summary of the mean, standard deviation (SD), range (min and max), and number of observation (n) of physical and chemical variables measured at the surface of the reservoir and its inflows.

| Variables                  | Units                                 | Reservoir |      |       |      |     | Inflows |       |      |       |    |
|----------------------------|---------------------------------------|-----------|------|-------|------|-----|---------|-------|------|-------|----|
|                            |                                       | Mean      | SD   | Min   | Max  | n   | Mean    | SD    | Min  | Max   | n  |
| Water temperature          | °C                                    | 31        | 0.8  | 24    | 32   | 134 | 27      | 2.4   | 24   | 30    | 10 |
| DOC                        | mg.L <sup>-1</sup>                    | 0.9       | 0.2  | 0.3   | 1.8  | 115 | 0.8     | 0.4   | 0.4  | 1.3   | 8  |
| TP                         | µg.L <sup>-1</sup>                    | 5.9       | 2.4  | 2.8   | 23.3 | 114 | 20.7    | 7.6   | 11.7 | 36    | 8  |
| TN                         | mg.L <sup>-1</sup>                    | 0.11      | 0.04 | 0.06  | 0.33 | 115 | 0.14    | 0.04  | 0.07 | 0.19  | 8  |
| Chla                       | µg.L <sup>-1</sup>                    | 1.3       | 0.7  | 0.3   | 4.0  | 112 | 2.1     | 1.7   | 0.1  | 4.4   | 9  |
| CO <sub>2</sub> diffusion  | mmol.m <sup>-2</sup> .d <sup>-1</sup> | 7.7       | 18.2 | -30.8 | 80.0 | 129 | 137.3   | 192.4 | 9.7  | 593.9 | 8  |
| CH <sub>4</sub> diffusion  | mmol.m <sup>-2</sup> .d <sup>-1</sup> | 0.6       | 0.6  | 0.03  | 3.7  | 129 | 30.7    | 37.4  | 1.2  | 113.4 | 8  |
| N <sub>2</sub> O diffusion | nmol.m <sup>-2</sup> .d <sup>-1</sup> | -0.2      | 2.1  | -7.1  | 2.7  | 15  |         |       |      |       | 0  |
| [CO <sub>2</sub> ]         | µmol.L <sup>-1</sup>                  | 16.3      | 5.2  | 6.8   | 36.2 | 132 | 60.1    | 34.9  | 10.1 | 113.5 | 10 |
| [CH <sub>4</sub> ]         | µmol.L <sup>-1</sup>                  | 0.2       | 0.2  | 0.0   | 1.2  | 137 | 6.6     | 4.3   | 0.6  | 14.8  | 10 |
| [N <sub>2</sub> O]         | nmol.L <sup>-1</sup>                  | 5.6       | 1.2  | 3.9   | 7.8  | 15  | 6.1     |       | 5.2  | 7.0   | 2  |

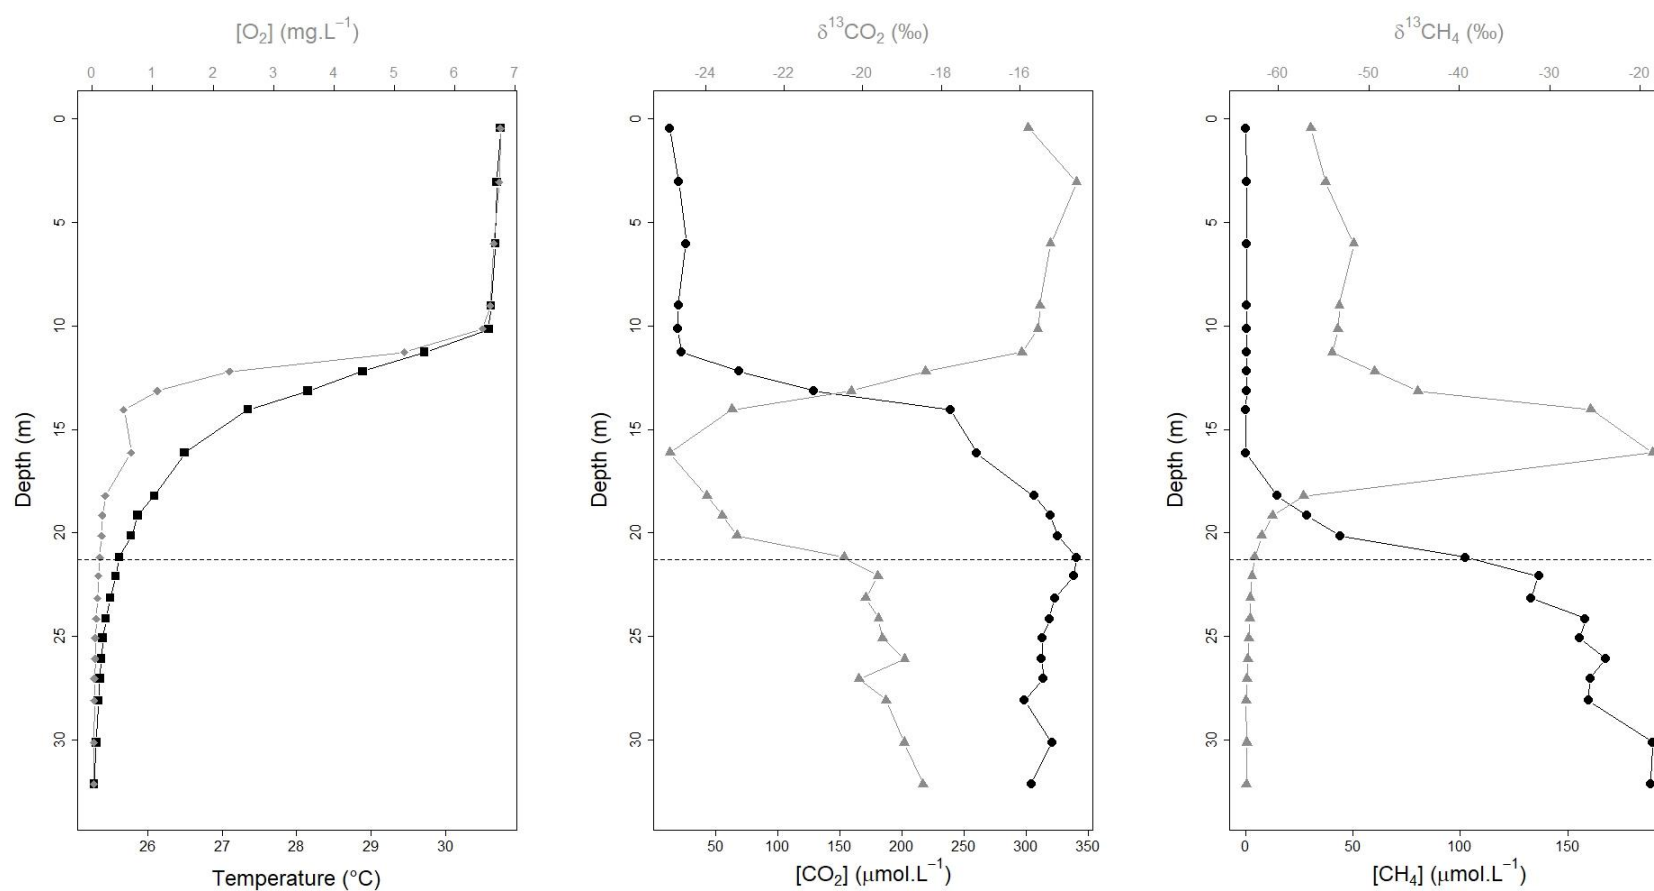

**Figure S1:** Profile example of water temperature (black squares), dissolved oxygen concentration (gray diamonds),  $\text{CO}_2$  and  $\text{CH}_4$  concentrations (black circles) and isotopic  $\delta^{13}\text{C}$  signature (gray triangles) in the main basin of the reservoir right upstream of the dam in Aug 2018. The horizontal dashed line represent the water withdrawal depth.

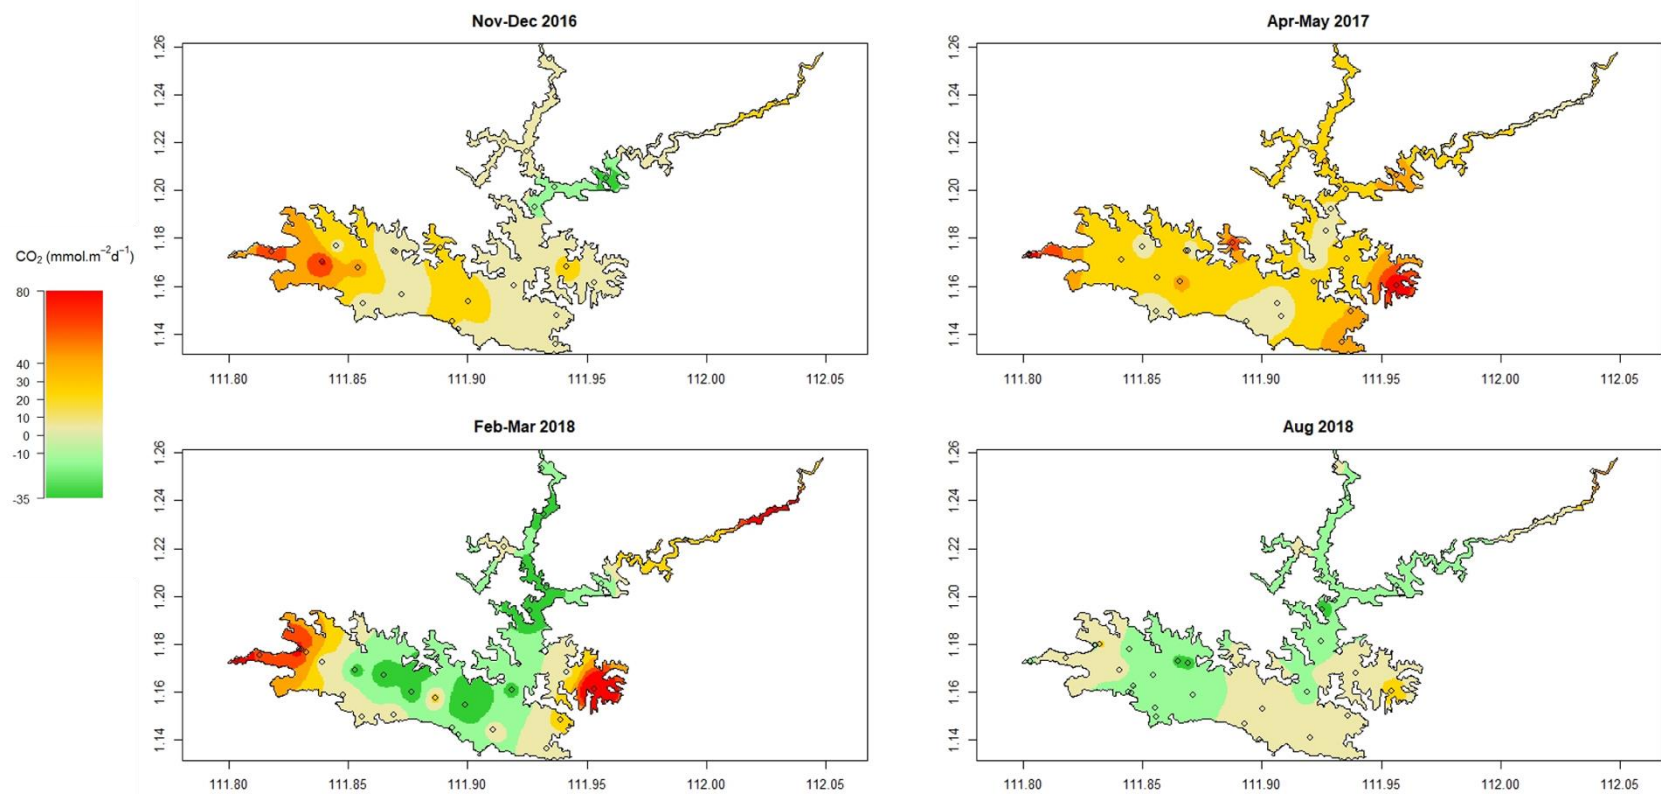

**Figure S2:** Maps of the spatially interpolated surface CO<sub>2</sub> diffusive flux in Batang Ai reservoir for each sampling campaign. Unit is in  $\text{mmol.m}^{-2}.\text{d}^{-1}$ . Graph axes are the spatial coordinates (latitude and longitude).

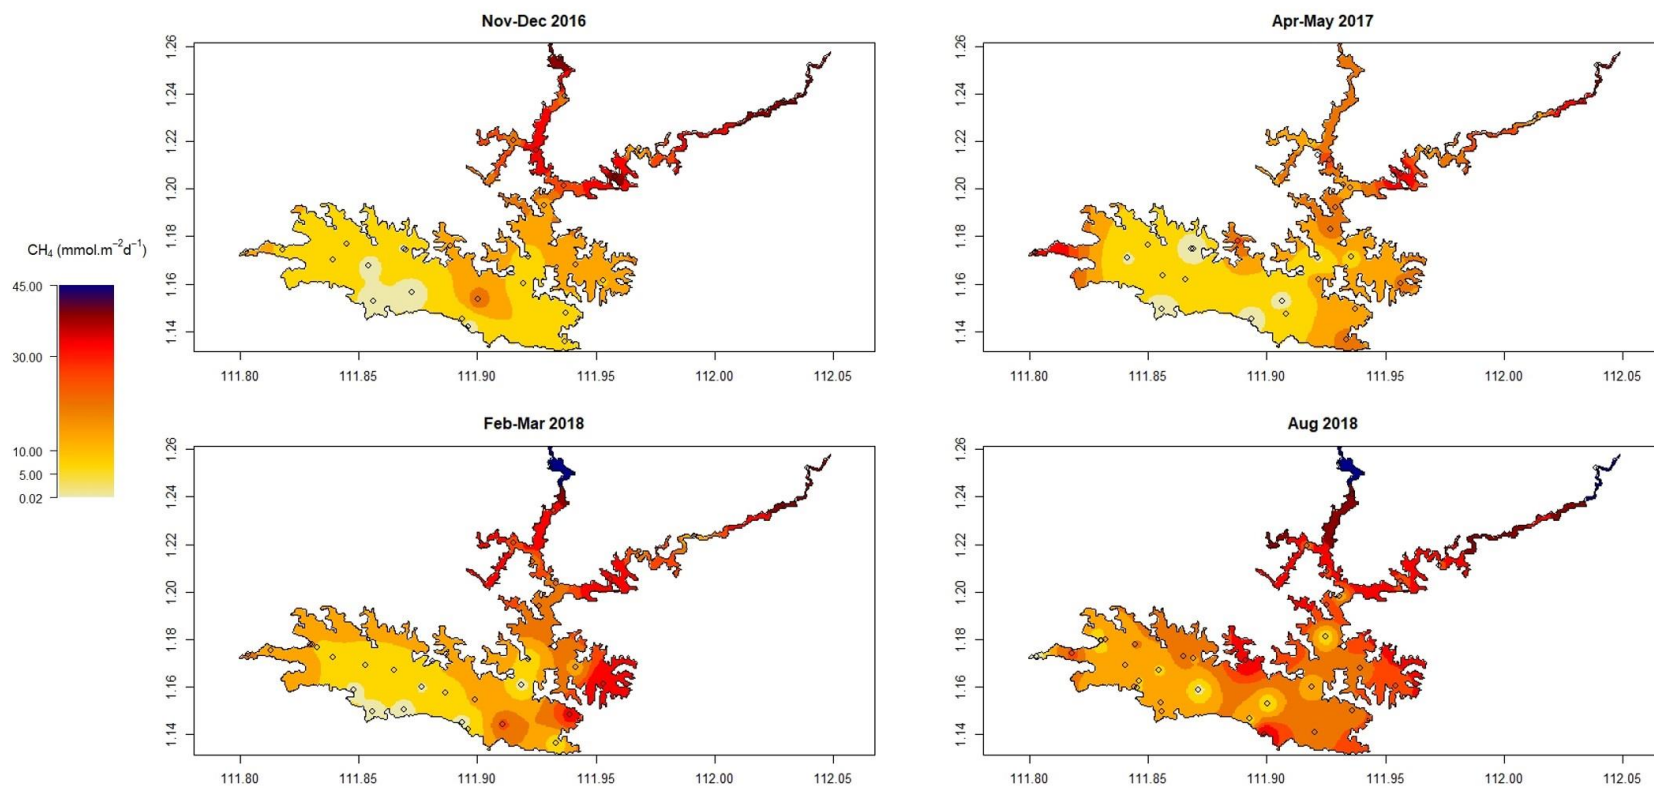

**Figure S3:** Maps of the spatially interpolated surface  $\text{CH}_4$  diffusive flux in Batang Ai reservoir for each sampling campaign. Unit is in  $\text{mmol.m}^{-2}.\text{d}^{-1}$ . Graph axes are the spatial coordinates (latitude and longitude).

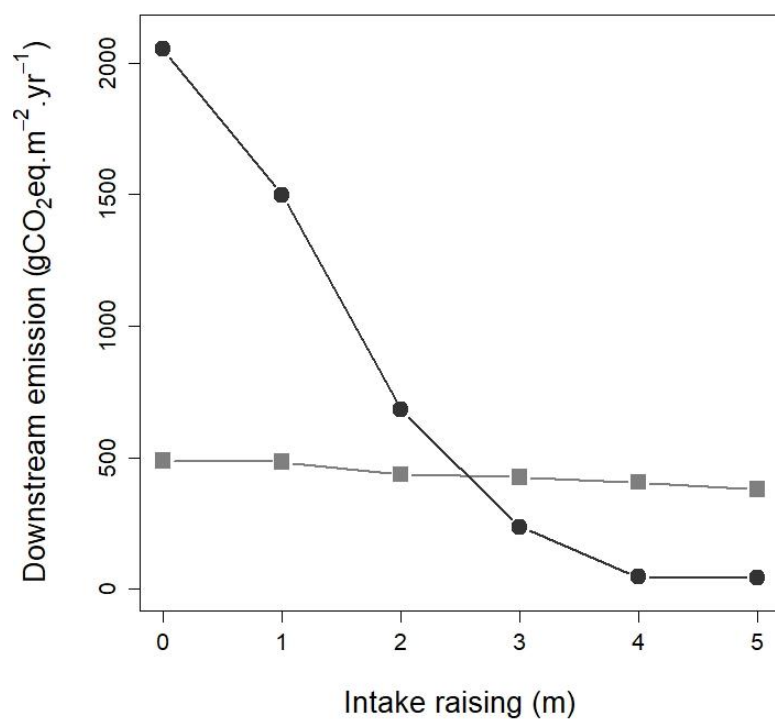

**Figure S4:** Simulated downstream emissions (including degassing) of CO<sub>2</sub> (gray squares) and CH<sub>4</sub> (dark circles) under different water withdrawal depth raise. Simulated emissions do not take into account CH<sub>4</sub> oxidation in the outflow river.

**Table S2:** Equations used to derive modeled CO<sub>2</sub> and CH<sub>4</sub> emissions based on the G-res and Barros et al. models. Input variables are described in Table S3.

|                                                     | G-res model                                                                                                                                                                                       | Barros et al. model                                                                                                               |
|-----------------------------------------------------|---------------------------------------------------------------------------------------------------------------------------------------------------------------------------------------------------|-----------------------------------------------------------------------------------------------------------------------------------|
| <b>log<sub>10</sub> (CO<sub>2</sub> diffusion)</b>  | 1.7892 - 0.3364 log <sub>10</sub> (Age) + 0.0400 Effective temperature CO <sub>2</sub> +<br>0.06918 log <sub>10</sub> (Reservoir area) + 0.0216 Soil C content + 0.1472<br>log <sub>10</sub> (TP) | 3.06 - 0.16 log <sub>10</sub> (Age) - 0.01 Latitude + 0.41 log <sub>10</sub> (DOC input) -<br>log <sub>10</sub> (400)             |
| <b>log<sub>10</sub> (CH<sub>4</sub> diffusion)</b>  | 0.8804 - 0.0116 Age + 0.6068 log <sub>10</sub> (% littoral area / 100) + 0.04828<br>Effective temperature CH <sub>4</sub>                                                                         | 1.33 - 0.36 log <sub>10</sub> (Age) - 0.32 log <sub>10</sub> (Mean depth) + 0.39 log <sub>10</sub><br>(DOC input) - 0.01 Latitude |
| <b>log<sub>10</sub> (CH<sub>4</sub> ebullition)</b> | -0.98574 + 1.0075 log <sub>10</sub> (% littoral area / 100) + 0.04928<br>(Cumulative global horizontal radiance)                                                                                  | -                                                                                                                                 |
| <b>CH<sub>4</sub> degassing</b>                     | 10 <sup>(-5.5029 + 2.2857 log<sub>10</sub> (Modeled CH<sub>4</sub> diffusion) + 0.9866 log<sub>10</sub> (Water residence time))</sup> ×<br>Discharge / Reservoir area                             | -                                                                                                                                 |



**Table S3:** Input variables values, units, and source used in the modeling of Batang Ai CO<sub>2</sub> and CH<sub>4</sub> emissions.

| Input variable                        | Value                  | Unit                                                  | Source                                                                                                                  |
|---------------------------------------|------------------------|-------------------------------------------------------|-------------------------------------------------------------------------------------------------------------------------|
| % Littoral area                       | 5.15                   | %                                                     | $(1 - (1 - (3 / \text{Maximum depth})) ((\text{Maximum depth} / \text{Mean depth}) - 1)) \times 100$                    |
| Age                                   | 33                     | year                                                  | Mean reservoir age at sampling years (2016 - 2018)                                                                      |
| Annual runoff                         | 2219                   | mm.yr <sup>-1</sup>                                   | UNH/GRDC Composite Runoff Fields V1.0 <sup>52</sup>                                                                     |
| Catchment area                        | 1142                   | km <sup>2</sup>                                       | GranD database V1.3 <sup>1</sup>                                                                                        |
| Cumulative global horizontal radiance | 56.4                   | kWh.m <sup>-2</sup> .yr <sup>-1</sup>                 | Surface meteorology and Solar Energy <sup>53</sup>                                                                      |
| Discharge                             | 106                    | m <sup>3</sup> .s <sup>-1</sup>                       | Average during the four sampling times (provided by Sarawak Energy)                                                     |
| DOC                                   | 0.8                    | mg.L <sup>-1</sup>                                    | Average of measured surface values in this study                                                                        |
| DOC input                             | 81.93                  | mg.m <sup>-2</sup> .d <sup>-1</sup>                   | $(\text{DOC} \times \text{Volume}) / (\text{Reservoir area} \times \text{Water residence time} \times 1000 \times 365)$ |
| Effective temperature CH <sub>4</sub> | 26.37                  | °C                                                    | Mean annual temperature corrected for the effect on CH <sub>4</sub> from G-res tool <sup>54</sup>                       |
| Effective temperature CO <sub>2</sub> | 26.37                  | °C                                                    | Mean annual temperature corrected for the effect on CO <sub>2</sub> from G-res tool <sup>54</sup>                       |
| Latitude                              | 1.16                   | Decimal degrees                                       | Google earth                                                                                                            |
| Maximum depth                         | 85                     | m                                                     | GranD database V1.3 <sup>1</sup> – Height dam wall                                                                      |
| Mean depth                            | 34.4                   | m                                                     | GranD database V1.3 <sup>1</sup>                                                                                        |
| Modeled CH <sub>4</sub> diffusion     | 134                    | gCO <sub>2</sub> eq.m <sup>-2</sup> .yr <sup>-1</sup> | Average over 100 years of CH <sub>4</sub> diffusion modeled based on the G-res equation (Table S2)                      |
| Reservoir area                        | 68.4                   | km <sup>2</sup>                                       | GranD database V1.3 <sup>1</sup>                                                                                        |
| Soil C content                        | 2.41                   | kgC.m <sup>-2</sup>                                   | Estimated based on Wasli et al. 2011                                                                                    |
| TP                                    | 6.77                   | µg.L <sup>-1</sup>                                    | Average of measured surface values in this study                                                                        |
| Volume                                | 2360 x 10 <sup>6</sup> | m <sup>3</sup>                                        | GranD database V1.3 <sup>1</sup>                                                                                        |
| Water residence time                  | 0.93                   | year                                                  | $(\text{Mean depth} \times \text{Reservoir area}) / (\text{catchment area} \times \text{Annual runoff}) \times 1000$    |

## Modeling downstream river oxidation

The following section describes the conceptual framework underlying the isotopic model used to estimate CH<sub>4</sub> oxidation in the outflow of the reservoir. For that, we assume that the only source of water and CH<sub>4</sub> to the outflow (starting right downstream of the power house) is the reservoir discharge. We also assume oxidation and evasion to the atmosphere are the only two loss processes for CH<sub>4</sub> in the outflow, and that both reactions have a constant specific rate (they are a linear function of CH<sub>4</sub> concentration). When following a parcel of water travelling along the river, the change in CH<sub>4</sub> concentration can thus be described as:

$$\frac{d[CH_4]}{dt} = -k_{oxi}[CH_4] - k_{eva}[CH_4] \quad (Eq.S1)$$

with  $k_{oxi}$  and  $k_{eva}$  the rate coefficients of CH<sub>4</sub> oxidation and evasion respectively, and  $[CH_4]$  the CH<sub>4</sub> concentration. Integration of Eq.S1 yields the following generic time-depend solution:

$$[CH_4]_t = [CH_4]_0 e^{-(k_{oxi}+k_{eva})t} \quad (Eq.S2)$$

The instantaneous oxidation rate at a given time (t) or at a given point in the river is equal to:

$$oxidation\ rate = k_{oxi} [CH_4]_t \quad (Eq.S3)$$

Combining Eq.S2 and Eq.S3 yields the following equation:

$$oxidation\ rate = k_{oxi} [CH_4]_0 e^{-(k_{oxi}+k_{eva})t} \quad (Eq.S4)$$

Hence, the total amount of CH<sub>4</sub> oxidized between time 0 and time t (or between km 0 and t in the river) is derived from the integration of Eq.S4:

$$amount\ oxidized = \int_0^t k_{oxi} [CH_4]_0 e^{-(k_{oxi}+k_{eva})t} dt \quad (Eq.S5)$$

Simplifying Eq.S5 yields:

$$amount\ oxidized = [CH_4]_0 \left( \frac{k_{oxi}}{(k_{oxi} + k_{eva})} \right) (1 - e^{-(k_{oxi}+k_{eva})t}) \quad (Eq.S6)$$

The amount oxidized can also be calculated as the product of the original CH<sub>4</sub> concentration and the fraction of CH<sub>4</sub> oxidized (F<sub>ox</sub>):

$$\text{amount oxidized} = [CH_4]_0 F_{ox} \quad (Eq. S7)$$

According to Eq.S6 and Eq.S7, we can derive F<sub>ox</sub> from the following equation:

$$F_{ox} = \left( \frac{k_{oxi}}{(k_{oxi} + k_{eva})} \right) (1 - e^{-(k_{oxi} + k_{eva}) t}) \quad (Eq. S8)$$

In Eq.S8, the second term of the product can be rearranged using Eq.S2 to represent the remaining fraction of CH<sub>4</sub> concentration at time or km t:

$$F_{ox} = \left( \frac{k_{oxi}}{(k_{oxi} + k_{eva})} \right) \left( 1 - \frac{[CH_4]_t}{[CH_4]_0} \right) \quad (Eq. S9)$$

Given a fractionation factor  $\alpha$  for CH<sub>4</sub> oxidation, the behavior of the two CH<sub>4</sub> isotopes (<sup>12</sup>CH<sub>4</sub> and <sup>13</sup>CH<sub>4</sub>) can be described based on Eq.S2 as following:

$$[^{12}CH_4]_t = [^{12}CH_4]_0 e^{-(k_{oxi}^{12} + k_{eva}) t} \quad (Eq. S10)$$

$$[^{13}CH_4]_t = [^{13}CH_4]_0 e^{-\left(\frac{k_{oxi}^{12}}{\alpha} + k_{eva}\right) t} \quad (Eq. S11)$$

With [<sup>12</sup>CH<sub>4</sub>] and [<sup>13</sup>CH<sub>4</sub>] the concentrations of the two isotopes, and k<sub>oxi</sub><sup>12</sup> the rate coefficient of oxidation for the <sup>12</sup>CH<sub>4</sub> isotope. The isotopic ratio of CH<sub>4</sub> concentration at t (R<sub>t</sub>) can be derived from Eq.S10 and Eq.S11 as following:

$$R_t = \frac{[^{13}CH_4]_t}{[^{12}CH_4]_t} = \frac{[^{13}CH_4]_0 e^{-\left(\frac{k_{oxi}^{12}}{\alpha} + k_{eva}\right) t}}{[^{12}CH_4]_0 e^{-(k_{oxi} + k_{eva}) t}} \quad (Eq. S12)$$

By simplifying Eq.S12, R<sub>t</sub> can be written as:

$$R_t = R_0 e^{(1 - \frac{1}{\alpha}) \cdot k_{oxi} t} \quad (Eq. S13)$$

The term t can be isolated from equation Eq.S13:

$$t = \frac{\ln(R_t/R_0)}{(1 - \frac{1}{\alpha}) \cdot k_{oxi}} \quad (Eq. S14)$$

Similarly, the term t can be isolated by rearranging Eq.S2:

$$t = \frac{\ln([CH_4]_t/[CH_4]_0)}{-(k_{oxi} + k_{eva})} \quad (Eq. S15)$$

Combining Eq.S14 and Eq.S15 results in:

$$\frac{\ln(R_t/R_0)}{(1 - \frac{1}{\alpha}) \cdot k_{oxi}} = \frac{\ln([CH_4]_t/[CH_4]_0)}{-(k_{oxi} + k_{eva})} \quad (Eq. S16)$$

Rearranging E.S16 yields:

$$\frac{-\ln(R_t/R_0)}{(1 - \frac{1}{\alpha}) \cdot \ln([CH_4]_t/[CH_4]_0)} = \frac{k_{oxi}}{(k_{oxi} + k_{eva})} \quad (Eq. S17)$$

Using Eq.S9 and Eq.S17, we can derive  $F_{ox}$  as:

$$F_{ox} = \frac{k_{oxi}}{(k_{oxi} + k_{eva})} \left( 1 - \frac{[CH_4]_t}{[CH_4]_0} \right) = \frac{-\ln(R_t/R_0) \cdot (1 - [CH_4]_t/[CH_4]_0)}{(1 - \frac{1}{\alpha}) \cdot \ln([CH_4]_t/[CH_4]_0)} \quad (Eq. S18)$$

The isotopic ratios ( $R_t$  and  $R_0$ ) can be converted to  $\delta^{13}CH_4$  expressed in ‰ using the following standard isotopic equation calculation:

$$\delta^{13}CH_4 = \left( \frac{[^{13}CH_4]:[^{12}CH_4]}{[^{13}CH_4]_{std}: [^{12}CH_4]_{std}} - 1 \right) \times 1000 \quad (Eq. S19)$$

with  $[^{13}CH_4]_{std}$ :  $[^{12}CH_4]_{std}$  the standard reference Pee Dee Belemite isotopic carbon ratio. The conversion of  $R_t$  and  $R_0$  to  $\delta^{13}CH_4$  in Eq.S18 results in the following equation for  $F_{ox}$  calculation:

$$F_{ox} = \frac{-[\ln(\delta^{13}CH_{4_t} + 1000) - \ln(\delta^{13}CH_{4_0} + 1000)] \cdot (1 - [CH_4]_t/[CH_4]_0)}{(1 - \frac{1}{\alpha}) \cdot \ln([CH_4]_t/[CH_4]_0)} \quad (Eq.S20)$$

Eq.S20 was used to determine  $F_{ox}$  and  $CH_4$  oxidation (product of  $F_{ox}$  and  $[CH_4]_0$ ) in Batang Ai river outflow using km 0 and 19 as a start and end points of the river stretch. Sampling of  $CH_4$  concentration and isotopic signature was conducted at two other points within this river stretch (km 0.6 and 2.7). This additional sampling resolution can help test the adequacy of the model and its conceptual assumptions by recalculating  $CH_4$  oxidation in individual segments (between 0-0.6 km, 0.6-2.7 km, and 2.7-19 km). If the model assumptions are correct (absence of other  $CH_4$  source in the river, constant specific oxidation rate, and constant river velocity), the amount of  $CH_4$  oxidized in the entire stretch ( $Ox_{total}$ ) should equal the sum of the amount oxidized in each individual segment ( $Ox_{sum}$ ). In two of the sampling campaigns (Apr-May 2017 and Feb-Mar 2018), the difference between  $Ox_{total}$  and  $Ox_{sum}$  was very small ( $CV < 5\%$ ). In the two other campaigns, this difference was larger ( $CV$  of 12 and 35 % for Nov-Dec 2016 and Aug 2018 respectively), due to an additional  $CH_4$  source causing occasional increases of  $CH_4$  concentration along the stretch. Overall, model assumptions appear reasonable, however, to avoid overestimating the amount oxidized in cases of additional  $CH_4$  sources, we considered  $Ox_{total}$  as the more suitable estimate, since it is less influenced by  $CH_4$  addition in individual segments.
